# Supplementary material
Source: PubMed Central journal article supplement (PMC9300420)
Supplement: plantbiotechnology-39-2-22.0120a-s001.pdf [file plantbiotechnology-39-2-22.0120a-s001.pdf]

Supplementary Table S1. Oligo nucleotides used in this study

| PCR targets or construction purpose                      | for which vector/plasmid | template (reference)        | Forward primer/sense oligo name | Forward primer/sense oligo sequence                         | Reverse primer /antisense oligo name | Reverse primer / antisense oligo sequence                   |
|----------------------------------------------------------|--------------------------|-----------------------------|---------------------------------|-------------------------------------------------------------|--------------------------------------|-------------------------------------------------------------|
| GFP CDS                                                  | pBCH1_GFP (pro35S:GFP)   | pENTR_GFP                   | KT1191                          | ccctctagaATGGTGAGCAAGGGCGAGGA                               | KT1192                               | aaactcagctcCTGTACAGCTCGTCCATGCC                             |
| ZmUBQ promoter                                           | pPUB                     | pBUH4 (1)                   | KT188                           | cccggtaccCTGCAGTGCAGCGTGACCCG                               | KT189                                | gggaagctCTGCAGAAAGTAAACACCAAAACACAGG                        |
| Gateway cassette with Nos terminator                     | pBS_PUG1                 | pWB2 (2)                    | KT190                           | cccaagctTCACAAGTTTGTACAAAAAAGCTGAACGA                       | KT192                                | ccctctagaCGCATGTCTTGGCTGTGAAGCT                             |
| Gateway cassette with N-terminal GFP and Nos terminator  | pBS_PUG2                 | pWB6 (2)                    | KT191                           | cccaagctATGGTGAGCAAGGGCGAGGAGC                              | KT192                                | ccctctagaCGCATGTCTTGGCTGTGAAGCT                             |
| Gateway cassette with C-terminal GFP and Nos terminator  | pBS_PUG3                 | pWB4 (2)                    | KT190                           | cccaagctTCACAAGTTTGTACAAAAAAGCTGAACGA                       | KT192                                | ccctctagaCGCATGTCTTGGCTGTGAAGCT                             |
| pPUG2 inverse PCR fragment without GFP                   | pBS_PUG4                 | pBS_PUG2                    | KT1551                          | CTCCTCGCCCTTGTCTCAACAT                                      | KT1552                               | GGCATGGACGAGCTGTACAAGCAAGTTTGTACAaaaaagctgaacgaga           |
| pPUG3 inverse PCR fragment without GFP                   | pBS_PUG5                 | pBS_PUG3                    | KT1551                          | CTCCTCGCCCTTGTCTCAACAT                                      | KT1555                               | GGCATGGACGAGCTGTACAAGCAAGTTTGTACAaaaaagctgaacgaga           |
| mCherry coding sequence                                  | pBS_PUG4                 | pUC19_35S:mCherry           | KT1553                          | GATAAgcttATGGTGAGCAAGGGCGAGGAG                              | KT1554                               | CAAACTTGTCTTGTACAGCTGTCCATGCC                               |
| mCherry coding sequence                                  | pBS_PUG5                 | pUC19_35S:mCherry           | KT1556                          | cglttaagctttgttacaagaatggtgatacATGGTGAGCAAGGGCGAGGAG        | KT654                                | TTACTTGTACAGCTGTCCATGCC                                     |
| OsAct1 promoter, NptII and A/PAB5 terminator             | pPUBn                    | pPNhyPBase (3)              | KT1550                          | gtactgaatcaacccgcaatggaatGTGAGCAAGGGCGAGGAG                 | KT1517                               | GCACAGAAAGGACTTGCTCTTGGAGCTAGGcaagcaccacccgatttgg           |
| OsAct1 promoter, NptII and A/PAB5 terminator             | pPgn                     | pPNhyPBase (3)              | KT1516                          | GGCCATCGTTGAAGTGCCCTGTGCCGACAGCctctactactctcactcaactacat    | KT1517                               | GCACAGAAAGGACTTGCTCTTGGAGCTAGGcaagcaccacccgatttgg           |
| Histon H2B (LOC_Os01g05610) CDS amplification            | pENTR_H2B                | rice cDNA from shoot apices | KT534                           | caccATGGCCGCCAAGGCAGAGAA                                    | KT536                                | AGCGGAGTGAATTTGGTGAACG                                      |
| OsDCP2 (LOC_Os02g56210) CDS amplification                | pENTR_OsDCP2             | rice cDNA from shoot apices | DCP2-FL-F                       | caccTGATGGCGATGGCGGGCGG                                     | DCP2-woST-R                          | GGTAGTAGGAAGGAAGCTTC                                        |
| TOB3 (LOC_Os10g36420) CDS amplification                  | pENTR_TOB3               | rice cDNA from shoot apices | KT1397                          | caccATGCTGCTGCTGCTCTGCTC                                    | KT1460                               | GTACGGTGAACACCCATGTTG                                       |
| GUS CDS amplification                                    | pENTR_GUS                | pBGH1 (4)                   | KT1391                          | caccATGGATCCCTACAGGgtaaatctagtt                             | KT1392                               | TTGTTTGCCTCCCTGCTCGC                                        |
| CyclinB1;1 promoter (LOC_Os01g59120)                     | pPUG3_proCYCB1;1-GUS     | rice genome DNA             | KT1546                          | ttglaatacgaactatagggcgcaatggttaccacgggtgtaagcagcaggagataca  | KT1547                               | cggaGCCTGCTTTTTGTACAAACTTGTGAaagcttCTTTGATCGTGCAGTGAGCACGGA |
| Oshox1 promoter (LOC_Os10g41230)                         | pPUG3_proOshox1-TOB3     | rice genome DNA             | KT1507                          | ttglaatacgaactatagggcgcaatggttaccGTTGTACAGAGCTCCGAAATCAATGC | KT1508                               | cggaGCCTGCTTTTTGTACAAacttgaaaacttTGATTCTCTCAACTCTCTCCACTTCT |
| Replacing Histone H2B in pENTR_H2B with oligo nucleotide | pENTR2.2                 | -                           | KT676                           | GGCCAAaggcccttatcagataaagcgccgctcagaaaacctgcaagttt          | KT677                                | cgcaaaacctgcaagtttctagagcggcgcccttctagataaaggccctt          |
| pENTR inverse PCR to clone OSH15 genomic DNA fragment    | pENTR_gOSH15             | pENTR2.2                    | pE_inv_OSH15 F                  | catgtgcatgtagctttgtaggatttGGCCGCGGGAGCTGCTT                 | pE_inv_OSH15 R                       | gcttttaactggcgcaagaaatatttttCCGCCGACCACAGCTTT               |
| N-terminal region of OSH15                               | pCR_Blunt_OSH15N         | pENTR_gOSH15                | OSH15_N F                       | ttcctgttcaagctgtagtgaatctctc                                | OSH15_N R                            | CCGTGACCCTGGTACTCTGGACCGGGCCAGCC                            |
| Inverse PCR of pCR_Blunt_OSH15N                          | pCR_Blunt_GFP-OSH15N     | pCR_Blunt_OSH15N            | KT651                           | AGCTCCTCGCCCTTGTCTCACCATcaaaacacacacagaacacaaaaga           | KT652                                | ctgcccagctcagctgcaATGGATCAGAGCTTTGGGAATCT                   |
| GFP CDS with 10x Alanine linker                          | pCR_Blunt_GFP-OSH15N     | gGFP-OSH1 (5)               | KT653                           | gttttATGGTGAGCAAGGGCGAGGA                                   | KT654                                | CTGATCCAATgcaagctgcaagctcggg                                |
| pENTR inverse PCR to clone TOB3 genomic DNA fragment     | pENTR_gTOB3              | pENTR2.2                    | KT1351                          | gaaactgctgctgtgtagcagcatgaccaTTTGGCCCGCGAGCTGCTTT           | KT1352                               | gttcaatactaaactatagctgaccTTTGGCCCGACCCAGCTTT                |
| C-terminal region of TOB3                                | pCR_Blunt_TOB3C          | pENTR_gTOB3                 | TOB3_C F                        | tttaattgtgaaactctgaatcagcag                                 | TOB3_C R                             | aaagagatgctgtagttagcactgata                                 |
| Inverse PCR of pCR_Blunt_TOB3C                           | pCR_Blunt_TOB3-mCherry_C | pCR_Blunt_TOB3_C            | KT1410                          | CACCAATgcccagcagctgctgctGATCGGTGCAACACCCATGTTGG             | KT1411                               | GACGAGCTGTACAAAGaagccagcagataaattgtagaagtt                  |
| mCherry CDS with 6x Alanine linker                       | pCR_Blunt_TOB3C-mCherry  | pENTR_mCherry               | KT1412                          | CCGTACgcaagcagctgctgcaATGGTGAGCAAGGGCGAGGA                  | KT1413                               | tttagctggcttactTTGTACAGCTGTCCATGCCG                         |
| qRT-PCR primers for GFP                                  | -                        | rice cDNA                   | KT544                           | GGCTTCTGTTGGGCTCTT                                          | KT545                                | ATCCTGGTGGAGCTGGACGG                                        |
| qRT-PCR primers for RAc1                                 | -                        | rice cDNA                   | KT546                           | GCCATCCATTGTGCACAGG                                         | KT547                                | AGAAACAAGCAGGAGGACGCG                                       |

## Reference

- Nigorikawa, M., Watanabe, A., Furukawa, K., Sonoki, T., and Ito, Y. (2012). Enhanced saccharification of rice straw by overexpression of rice exo-glucanase. *Rice* (N Y) 5, 14.
- Nakagawa, T., Kurose, T., Hino, T., Tanaka, K., Kawamukai, M., Niwa, Y., Toyooka, K., Matsuoka, K., Jinbo, T., and Kimura, T. (2007a). Development of series of gateway binary vectors, pGWBs, for realizing efficient construction of fusion genes for plant transformation. *J Biosci Bioeng* 104, 34-41.
- Nishizawa-Yokoi, A., Endo, M., Osakabe, K., Saika, H., and Toki, S. (2014). Precise marker excision system using an animal-derived piggyBac transposon in plants. *Plant J* 77, 454-463.
- Ito, Y., and Kurata, N. (2008). Disruption of KNOX gene suppression in leaf by introducing its cDNA in rice. *Plant Science* 174, 357-365.
- Tsuda, K., Ito, Y., Sato, Y., and Kurata, N. (2011). Positive autoregulation of a KNOX gene is essential for shoot apical meristem maintenance in rice. *Plant Cell* 23, 4368-4381.
